# Supplementary material for: Universal Patterns of Selection in Cancer and Somatic Tissues
Source: PubMed Central journal article supplement (PMC5720395; doi:10.1016/j.cell.2017.09.042), 2017-11-16
Supplement: mmc1.pdf [file mmc1.pdf]

**Cell, Volume 171**

**Supplemental Information**

**Universal Patterns of Selection  
in Cancer and Somatic Tissues**

**Iñigo Martincorena, Keiran M. Raine, Moritz Gerstung, Kevin J. Dawson, Kerstin Haase, Peter Van Loo, Helen Davies, Michael R. Stratton, and Peter J. Campbell**

**Table S1. [Related to Figure 1] List of cancer types and numbers of samples.**

| Cancer type                                                      | TCGA barcode | Short name used in this study | Samples (<3000 muts/exome) | Samples (<500 muts/exome) | TCGA calls used |
|------------------------------------------------------------------|--------------|-------------------------------|----------------------------|---------------------------|-----------------|
| Adrenocortical carcinoma                                         | ACC          | Adrenocortical                | 91                         | 88                        |                 |
| Bladder Urothelial Carcinoma                                     | BLCA         | Bladder                       | 390                        | 337                       |                 |
| Breast invasive carcinoma                                        | BRCA         | Breast                        | 702                        | 689                       |                 |
| Cervical squamous cell carcinoma and endocervical adenocarcinoma | CESC         | Cervix                        | 38                         | 36                        |                 |
| Colon and rectum adenocarcinoma                                  | COAD+READ    | Colorectum                    | 266                        | 226                       |                 |
| Esophageal carcinoma                                             | ESCA         | Esophagus                     | 180                        | 176                       |                 |
| Glioblastoma multiforme                                          | GBM          | Glioblastoma                  | 255                        | 255                       |                 |
| Head and Neck squamous cell carcinoma                            | HNSC         | Head-neck                     | 507                        | 482                       |                 |
| Kidney Chromophobe                                               | KICH         | Kidney-ChRCC                  | 66                         | 65                        | Yes             |
| Kidney renal clear cell carcinoma                                | KIRC         | Kidney-RCC                    | 314                        | 314                       |                 |
| Kidney renal papillary cell carcinoma                            | KIRP         | Kidney-Papill                 | 275                        | 275                       |                 |
| Acute Myeloid Leukemia                                           | LAML         | Myeloid-AML                   | 136                        | 136                       | Yes             |
| Brain Lower Grade Glioma                                         | LGG          | CNS-LGG                       | 467                        | 466                       |                 |
| Liver hepatocellular carcinoma                                   | LIHC         | Liver-HCC                     | 339                        | 334                       |                 |
| Lung adenocarcinoma                                              | LUAD         | Lung-Adeno                    | 367                        | 299                       |                 |
| Lung squamous cell carcinoma                                     | LUSC         | Lung-SCC                      | 167                        | 152                       |                 |
| Mesothelioma                                                     | MESO         | Mesothelioma                  | 80                         | 80                        |                 |
| Ovarian serous cystadenocarcinoma                                | OV           | Ovary                         | 262                        | 262                       |                 |
| Pancreatic adenocarcinoma                                        | PAAD         | Pancreas-Adeno                | 145                        | 145                       | Yes             |
| Pheochromocytoma and Paraganglioma                               | PCPG         | Pheo-Paragang                 | 178                        | 178                       | Yes             |
| Prostate adenocarcinoma                                          | PRAD         | Prostate                      | 497                        | 494                       | Yes             |
| Sarcoma                                                          | SARC         | Sarcoma                       | 247                        | 241                       |                 |
| Skin Cutaneous Melanoma                                          | SKCM         | Melanoma                      | 437                        | 262                       |                 |
| Stomach adenocarcinoma                                           | STAD         | Stomach                       | 360                        | 291                       |                 |
| Testicular Germ Cell Tumors                                      | TGCT         | Testis                        | 142                        | 142                       |                 |
| Thyroid carcinoma                                                | THCA         | Thyroid                       | 438                        | 438                       |                 |
| Thymoma                                                          | THYM         | Thymoma                       | 29                         | 28                        |                 |
| Uterine Corpus Endometrial Carcinoma                             | UCEC         | Endometrium                   | 233                        | 180                       |                 |
| Uterine Carcinosarcoma                                           | UCS          | Uterus-CarSarc                | 56                         | 55                        |                 |
| <b>All cancers with Caveman+Pindel calls</b>                     |              |                               | <b>Pancancer*</b>          | <b>6642</b>               | <b>6108</b>     |
| <b>All cancers</b>                                               |              |                               | <b>Pancancer</b>           | <b>7664</b>               | <b>7126</b>     |







**Table S3. [Related to Figure 4] List of 369 known cancer genes used in this study.**

|                 |               |                 |                  |                |                |                 |                |
|-----------------|---------------|-----------------|------------------|----------------|----------------|-----------------|----------------|
| <i>ABL1</i>     | <i>CCDC6</i>  | <i>EIF1AX</i>   | <i>HIST1H2BD</i> | <i>MED12</i>   | <i>POLE</i>    | <i>SMARCB1</i>  | <i>UPF3A</i>   |
| <i>ACO1</i>     | <i>CCND1</i>  | <i>EIF2S2</i>   | <i>HIST1H3B</i>  | <i>MED23</i>   | <i>POT1</i>    | <i>SMC1A</i>    | <i>VHL</i>     |
| <i>ACVR1</i>    | <i>CD1D</i>   | <i>ELF3</i>     | <i>HIST1H4E</i>  | <i>MEN1</i>    | <i>POU2AF1</i> | <i>SMC3</i>     | <i>WASF3</i>   |
| <i>ACVR1B</i>   | <i>CD58</i>   | <i>EML4</i>     | <i>HLA-A</i>     | <i>MET</i>     | <i>POU2F2</i>  | <i>SMO</i>      | <i>WT1</i>     |
| <i>ACVR2A</i>   | <i>CD70</i>   | <i>EP300</i>    | <i>HLA-B</i>     | <i>MGA</i>     | <i>PPM1D</i>   | <i>SMTNL2</i>   | <i>XIRP2</i>   |
| <i>ACVR2B</i>   | <i>CD79A</i>  | <i>EPAS1</i>    | <i>HLA-C</i>     | <i>MLH1</i>    | <i>PPP2R1A</i> | <i>SNX25</i>    | <i>XPO1</i>    |
| <i>ADNP</i>     | <i>CD79B</i>  | <i>EPHA2</i>    | <i>HNF1A</i>     | <i>MPL</i>     | <i>PPP6C</i>   | <i>SOCS1</i>    | <i>ZBTB20</i>  |
| <i>AJUBA</i>    | <i>CDC27</i>  | <i>EPS8</i>     | <i>HOXB3</i>     | <i>MPO</i>     | <i>PRDM1</i>   | <i>SOX17</i>    | <i>ZBTB7B</i>  |
| <i>AKT1</i>     | <i>CDC73</i>  | <i>ERBB2</i>    | <i>HRAS</i>      | <i>MSH2</i>    | <i>PRKAR1A</i> | <i>SOX9</i>     | <i>ZFHX3</i>   |
| <i>ALB</i>      | <i>CDH1</i>   | <i>ERBB3</i>    | <i>IDH1</i>      | <i>MSH6</i>    | <i>PSG4</i>    | <i>SPEN</i>     | <i>ZFP36L1</i> |
| <i>ALK</i>      | <i>CDH10</i>  | <i>ERCC2</i>    | <i>IDH2</i>      | <i>MTOR</i>    | <i>PSIP1</i>   | <i>SPOP</i>     | <i>ZFP36L2</i> |
| <i>ALPK2</i>    | <i>CDK12</i>  | <i>ERG</i>      | <i>IKBKB</i>     | <i>MUC17</i>   | <i>PTCH1</i>   | <i>SPTAN1</i>   | <i>ZFX</i>     |
| <i>AMER1</i>    | <i>CDK4</i>   | <i>ESR1</i>     | <i>IKZF1</i>     | <i>MUC6</i>    | <i>PTEN</i>    | <i>SRC</i>      | <i>ZMYM3</i>   |
| <i>APC</i>      | <i>CDKN1A</i> | <i>ETNK1</i>    | <i>IL6ST</i>     | <i>MXRA5</i>   | <i>PTPN11</i>  | <i>SRSF2</i>    | <i>ZNF471</i>  |
| <i>APOL2</i>    | <i>CDKN1B</i> | <i>EZH2</i>     | <i>IL7R</i>      | <i>MYD88</i>   | <i>PTPRB</i>   | <i>STAG2</i>    | <i>ZNF620</i>  |
| <i>ARHGAP35</i> | <i>CDKN2A</i> | <i>FAM104A</i>  | <i>ING1</i>      | <i>MYOCD</i>   | <i>QKI</i>     | <i>STAT3</i>    | <i>ZNF750</i>  |
| <i>ARHGAP5</i>  | <i>CDKN2C</i> | <i>FAM166A</i>  | <i>INTS12</i>    | <i>MYOD1</i>   | <i>RAC1</i>    | <i>STAT5B</i>   | <i>ZNF800</i>  |
| <i>ARID1A</i>   | <i>CEBPA</i>  | <i>FAM46C</i>   | <i>IPO7</i>      | <i>NBPF1</i>   | <i>RACGAP1</i> | <i>STK11</i>    | <i>ZNRF3</i>   |
| <i>ARID1B</i>   | <i>CHD4</i>   | <i>FAT1</i>     | <i>IRF4</i>      | <i>NCOR1</i>   | <i>RAD21</i>   | <i>STK19</i>    | <i>ZRSR2</i>   |
| <i>ARID2</i>    | <i>CHD8</i>   | <i>FBXO11</i>   | <i>ITGB7</i>     | <i>NF1</i>     | <i>RASA1</i>   | <i>STX2</i>     |                |
| <i>ARID5B</i>   | <i>CIB3</i>   | <i>FBXW7</i>    | <i>ITPKB</i>     | <i>NF2</i>     | <i>RB1</i>     | <i>SUFU</i>     |                |
| <i>ASXL1</i>    | <i>CIC</i>    | <i>FGFR1</i>    | <i>JAK1</i>      | <i>NFE2L2</i>  | <i>RBM10</i>   | <i>TBC1D12</i>  |                |
| <i>ATM</i>      | <i>CMTR2</i>  | <i>FGFR2</i>    | <i>JAK2</i>      | <i>NIPBL</i>   | <i>RET</i>     | <i>TBL1XR1</i>  |                |
| <i>ATP1A1</i>   | <i>CNBD1</i>  | <i>FGFR3</i>    | <i>JAK3</i>      | <i>NOTCH1</i>  | <i>RHEB</i>    | <i>TBX3</i>     |                |
| <i>ATP1B1</i>   | <i>CNOT3</i>  | <i>FLG</i>      | <i>KANSL1</i>    | <i>NOTCH2</i>  | <i>RHOA</i>    | <i>TCEB1</i>    |                |
| <i>ATP2B3</i>   | <i>COL2A1</i> | <i>FLT3</i>     | <i>KCNJ5</i>     | <i>NPM1</i>    | <i>RHOB</i>    | <i>TCF12</i>    |                |
| <i>ATRX</i>     | <i>COL5A1</i> | <i>FOSL2</i>    | <i>KDM5C</i>     | <i>NRAS</i>    | <i>RIT1</i>    | <i>TCF7L2</i>   |                |
| <i>AXIN1</i>    | <i>COL5A3</i> | <i>FOXA1</i>    | <i>KDM6A</i>     | <i>NSD1</i>    | <i>RNF43</i>   | <i>TCP11L2</i>  |                |
| <i>AXIN2</i>    | <i>CREBBP</i> | <i>FOXA2</i>    | <i>KDR</i>       | <i>NT5C2</i>   | <i>RPL10</i>   | <i>TDRD10</i>   |                |
| <i>AZGP1</i>    | <i>CRLF2</i>  | <i>FOXL2</i>    | <i>KEAP1</i>     | <i>NTN4</i>    | <i>RPL22</i>   | <i>TERT</i>     |                |
| <i>B2M</i>      | <i>CSDE1</i>  | <i>FOXQ1</i>    | <i>KEL</i>       | <i>NTRK3</i>   | <i>RPL5</i>    | <i>TET2</i>     |                |
| <i>BAP1</i>     | <i>CSF1R</i>  | <i>FRMD7</i>    | <i>KIT</i>       | <i>NUP210L</i> | <i>RPS15</i>   | <i>TG</i>       |                |
| <i>BCLAF1</i>   | <i>CSF3R</i>  | <i>FUBP1</i>    | <i>KLF4</i>      | <i>OMA1</i>    | <i>RPS2</i>    | <i>TGFBR2</i>   |                |
| <i>BCOR</i>     | <i>CTCF</i>   | <i>GAGE12J</i>  | <i>KLF5</i>      | <i>OR4A16</i>  | <i>RPS6KA3</i> | <i>TGIF1</i>    |                |
| <i>BHMT2</i>    | <i>CTNNA1</i> | <i>GATA1</i>    | <i>KLHL8</i>     | <i>OR4N2</i>   | <i>RREB1</i>   | <i>TIMM17A</i>  |                |
| <i>BIRC3</i>    | <i>CTNNB1</i> | <i>GATA2</i>    | <i>KMT2A</i>     | <i>OR52N1</i>  | <i>RUNX1</i>   | <i>TNF</i>      |                |
| <i>BMPR2</i>    | <i>CUL3</i>   | <i>GATA3</i>    | <i>KMT2B</i>     | <i>OTUD7A</i>  | <i>RXRA</i>    | <i>TNFAIP3</i>  |                |
| <i>BRAF</i>     | <i>CUL4B</i>  | <i>GNA11</i>    | <i>KMT2C</i>     | <i>PAPD5</i>   | <i>SELP</i>    | <i>TNFRSF14</i> |                |
| <i>BRCA1</i>    | <i>CUX1</i>   | <i>GNA13</i>    | <i>KMT2D</i>     | <i>PAX5</i>    | <i>SETBP1</i>  | <i>TOP2A</i>    |                |
| <i>BRCA2</i>    | <i>CYLD</i>   | <i>GNAQ</i>     | <i>KRAS</i>      | <i>PBRM1</i>   | <i>SETD2</i>   | <i>TP53</i>     |                |
| <i>BRD7</i>     | <i>DAXX</i>   | <i>GNAS</i>     | <i>KRT5</i>      | <i>PCBP1</i>   | <i>SF3B1</i>   | <i>TRAF3</i>    |                |
| <i>C3orf70</i>  | <i>DDX3X</i>  | <i>GNB1</i>     | <i>LATS2</i>     | <i>PDAP1</i>   | <i>SGK1</i>    | <i>TRAF7</i>    |                |
| <i>CACNA1D</i>  | <i>DDX5</i>   | <i>GNPTAB</i>   | <i>LCTL</i>      | <i>PDGFRA</i>  | <i>SH2B3</i>   | <i>TRIM23</i>   |                |
| <i>CALR</i>     | <i>DIAPH1</i> | <i>GPS2</i>     | <i>LZTR1</i>     | <i>PDSS2</i>   | <i>SLC1A3</i>  | <i>TSC1</i>     |                |
| <i>CARD11</i>   | <i>DICER1</i> | <i>GTF2I</i>    | <i>MAP2K1</i>    | <i>PDYN</i>    | <i>SLC26A3</i> | <i>TSC2</i>     |                |
| <i>CASP8</i>    | <i>DIS3</i>   | <i>GUSB</i>     | <i>MAP2K2</i>    | <i>PHF6</i>    | <i>SLC44A3</i> | <i>TSHR</i>     |                |
| <i>CBFB</i>     | <i>DNM2</i>   | <i>H3F3A</i>    | <i>MAP2K4</i>    | <i>PHOX2B</i>  | <i>SLC4A5</i>  | <i>TTL9</i>     |                |
| <i>CBL</i>      | <i>DNMT3A</i> | <i>H3F3B</i>    | <i>MAP2K7</i>    | <i>PIK3CA</i>  | <i>SMAD2</i>   | <i>TYRO3</i>    |                |
| <i>CBLB</i>     | <i>EEF1A1</i> | <i>HIST1H1C</i> | <i>MAP3K1</i>    | <i>PIK3R1</i>  | <i>SMAD4</i>   | <i>U2AF1</i>    |                |
| <i>CCDC120</i>  | <i>EGFR</i>   | <i>HIST1H1E</i> | <i>MAX</i>       | <i>PLCG1</i>   | <i>SMARCA4</i> | <i>UBR5</i>     |                |
